# Supplementary material
Source: Research Square preprint supplement (doi:10.21203/rs.3.rs-9013592/v1)
Supplement: Supplementary file 2 [file 252d4864ff1bf8ef0113f9d2.xlsx]

## Sheet: PWH
Sample ID	Lab	subject_ID	anatomical_site	Cognitive_status	Last Viral load	Brain_pathology	HIV Status	HIV-infected cell count	Estimated Number of Cells	Mean Reads per Cell	Median Genes per Cell	Number of Reads	Valid Barcodes	Sequencing Saturation	Q30 Bases in Barcode	Q30 Bases in RNA Read	Q30 Bases in UMI	Reads Mapped to Genome	Reads Mapped Confidently to Genome	Reads Mapped Confidently to Intergenic Regions	Reads Mapped Confidently to Intronic Regions	Reads Mapped Confidently to Exonic Regions	Reads Mapped Confidently to Transcriptome	Reads Mapped Antisense to Gene	Fraction Reads in Cells	Total Genes Detected	Median UMI Counts per Cell
NNAB1004Fm_GEX_MAH	Ho	1004	frontal cortex & WM BA9	Probable HAD	359458	Minimal non-diagnostic abnormalities, Other non-infectious pathology	PWH	3	6077	52608	2182	319698973	0.956	0.644	0.962	0.934	0.961	0.955	0.633	0.036	0.451	0.147	0.527	0.05	0.895	42013	5413
JB_1027	Rana	1004	cerebellum	~	~	~	PWH	0	1630	5329	425	8686239	0.975	0.606	0.971	0.894	0.964	0.912	0.854	0.036	0.451	0.366	0.73	0.066	0.67	22599	575
JB_1027_2	Rana	1004	cerebellum	~	~	~	PWH	0	3480	104343	819	363115322	0.97	0.968	0.905	0.922	0.907	0.918	0.866	0.036	0.449	0.381	0.741	0.067	0.83	31288	1293
JB_1056_2	Rana	1021	cerebellum	Possible MCMD	12384	Minimal non-diagnostic abnormalities	PWH	0	5739	10824	822	62117855	0.953	0.755	0.946	0.847	0.942	0.957	0.919	0.033	0.586	0.3	0.703	0.158	0.879	31255	1201
1039PFC	Spudich	1039	prefrontal cortex	Neuropsychological Impairment; does not meet criteria for syndromic disorder	1000000	HIV Encephalitis, Progressive multifocal leukoencephalopathy	PWH	10	21778	15328	1270	333815090	0.935	0.519	0.971	0.95	0.972	0.965	0.766	0.048	0.554	0.164	0.596	0.095	0.912	45160	1991
1039_HIVOUD_INS_MAH	Spudich	1039	insular cortex	~	~	~	PWH	0	11375	45752	2229	520424510	0.936	0.579	0.966	0.949	0.965	0.956	0.522	0.036	0.375	0.11	0.425	0.043	0.884	44072	5215
1039_HIVOUD_VST_MAH	Spudich	1039	ventral striatum	~	~	~	PWH	0	7814	41737	1594	326129450	0.937	0.659	0.966	0.943	0.968	0.958	0.497	0.034	0.335	0.128	0.411	0.036	0.778	40398	3228
1040_HIVOUD_INS_MAH	Spudich	1040	insular cortex	Unable to reliably assign neurocognitive diagnosis	<200	Other non-infectious pathology	PWH	0	21523	22179	1392	477358357	0.948	0.443	0.961	0.94	0.96	0.964	0.853	0.046	0.591	0.216	0.674	0.104	0.936	46449	2281
1040_HIVOUD_PFC_MAH	Spudich	1040	prefrontal cortex	~	~	~	PWH	0	11062	24350	2375	269363789	0.964	0.512	0.971	0.951	0.971	0.959	0.862	0.053	0.577	0.232	0.711	0.069	0.932	43089	4848
1040_HIVOUD_VST_MAH	Spudich	1040	ventral striatum	~	~	~	PWH	0	11788	22406	1246	264123533	0.957	0.569	0.967	0.947	0.968	0.943	0.622	0.045	0.416	0.161	0.517	0.037	0.89	42027	1993
1048_HIVOUD_INS_MAH	Spudich	1048	insular cortex	Neuropsychological Impairment or dementia due to other cause	90258	Leukoencephalopathy	PWH	0	15781	29429	1754	464421755	0.938	0.534	0.956	0.945	0.953	0.956	0.521	0.033	0.36	0.127	0.438	0.034	0.916	44400	4009
1048_HIVOUD_PFC_MAH	Spudich	1048	prefrontal cortex	~	~	~	PWH	0	9366	40510	2010	379413052	0.953	0.679	0.969	0.946	0.969	0.944	0.699	0.047	0.505	0.148	0.546	0.085	0.906	45415	4482
1048_HIVOUD_VST_MAH	Spudich	1048	ventral striatum	~	~	~	PWH	0	9403	32370	1152	304371866	0.952	0.693	0.967	0.942	0.969	0.959	0.672	0.041	0.432	0.199	0.554	0.056	0.869	41976	2006
JB_1041	Rana	1052	cerebellum	Probable HAD	<400	Minimal non-diagnostic abnormalities	PWH	0	5926	1557	403	9229226	0.964	0.434	0.972	0.903	0.966	0.955	0.923	0.034	0.496	0.393	0.714	0.149	0.937	26860	496
JB_1041_2	Rana	1052	cerebellum	~	~	~	PWH	0	6039	46293	1169	279561198	0.959	0.922	0.907	0.925	0.911	0.957	0.928	0.034	0.493	0.401	0.716	0.151	0.927	35942	1875
1059_HIVOUD_INS_MAH	Spudich	1059	insular cortex	Neuropsychological Impairment or dementia due to other cause	2780	Minimal non-diagnostic abnormalities	PWH	0	20863	28053	1511	585276080	0.955	0.593	0.956	0.931	0.955	0.952	0.616	0.036	0.427	0.153	0.522	0.036	0.937	44346	2873
1059_HIVOUD_PFC_MAH	Spudich	1059	prefrontal cortex	~	~	~	PWH	0	13790	30261	2670	417303854	0.966	0.525	0.969	0.938	0.968	0.959	0.872	0.048	0.552	0.272	0.695	0.101	0.918	45950	5656
1059_HIVOUD_VST_MAH	Spudich	1059	ventral striatum	~	~	~	PWH	0	12314	26143	1693	321924732	0.951	0.625	0.966	0.94	0.966	0.96	0.733	0.042	0.531	0.16	0.599	0.067	0.937	43210	3466
JB_1064_2	Rana	1068	cerebellum	Probable HAD	>750,000	Alzheimer type 2 gliosis, Hypoxic or ischemic damage, Minimal non-diagnostic abnormalities	PWH	0	10341	28212	1742	291736767	0.935	0.756	0.959	0.932	0.956	0.969	0.928	0.042	0.564	0.323	0.611	0.251	0.884	39481	3089
NNAB1071Fm_GEX_MAH	Ho	1071	frontal cortex & WM BA9	Probable MCMD	8584	Minimal non-diagnostic abnormalities	PWH	0	14018	22137	2148	310319850	0.957	0.354	0.949	0.94	0.948	0.966	0.865	0.049	0.566	0.249	0.686	0.103	0.927	45098	4656
JB_1057_2	Rana	1071	cerebellum	~	~	~	PWH	0	8830	4189	608	36987389	0.969	0.591	0.947	0.855	0.942	0.955	0.915	0.044	0.619	0.252	0.739	0.105	0.875	29983	871
1119_HIVOUD_INS_MAH	Spudich	1119	insular cortex	Other non-infectious pathology	41700	Other non-infectious pathology	PWH	0	28710	22282	1476	639719262	0.914	0.52	0.949	0.934	0.942	0.929	0.51	0.037	0.308	0.164	0.414	0.039	0.907	45275	2109
1119_HIVOUD_PFC_MAH	Spudich	1119	prefrontal cortex	~	~	~	PWH	0	13917	21292	1826	296324322	0.947	0.543	0.964	0.945	0.963	0.939	0.662	0.047	0.419	0.195	0.55	0.039	0.919	42563	3025
1119_HIVOUD_VST_MAH	Spudich	1119	ventral striatum	~	~	~	PWH	0	21668	13401	1003	290372351	0.963	0.596	0.966	0.944	0.966	0.963	0.854	0.044	0.591	0.219	0.714	0.065	0.924	42805	1465
1133_HIVOUD_PFC_MAH	Spudich	1133	prefrontal cortex	(Missing)	184000	Minimal non-diagnostic abnormalities	PWH	1	17438	27857	1684	485777730	0.947	0.525	0.968	0.947	0.966	0.955	0.832	0.053	0.61	0.168	0.673	0.076	0.945	45991	2969
1133_HIVOUD_INS_MAH	Spudich	1133	insular cortex	~	~	~	PWH	0	16132	35590	1746	574136488	0.963	0.607	0.951	0.928	0.945	0.952	0.806	0.05	0.59	0.165	0.677	0.048	0.951	44915	3422
1133_HIVOUD_VST_MAH	Spudich	1133	ventral striatum	~	~	~	PWH	0	5850	72088	2155	421715235	0.965	0.728	0.968	0.948	0.968	0.965	0.872	0.047	0.605	0.22	0.633	0.121	0.916	44044	5644
NNAB1163Fm_GEX_MAH	Ho	1163	frontal cortex & WM BA9	Neuropsychological Impairment or dementia due to other cause	374628	Alzheimer type 2 gliosis, Other non-infectious pathology	PWH	0	6851	59176	2406	405417228	0.955	0.671	0.967	0.929	0.967	0.961	0.82	0.041	0.568	0.211	0.189	0.039	0.496	40819	1172
1181VST	Spudich	1181	ventral striatum	Neuropsychological Impairment or dementia due to other cause	528	Other infections, Other non-infectious pathology	PWH	55	6782	56982	687	386448966	0.913	0.689	0.961	0.942	0.962	0.956	0.274	0.041	0.108	0.125	0.682	0.048	0.928	41757	5846
1181_HIVOUD_INS_MAH	Spudich	1181	insular cortex	~	~	~	PWH	0	10845	25330	2274	274701184	0.958	0.547	0.951	0.936	0.946	0.955	0.8	0.045	0.581	0.174	0.766	0.09	0.921	24867	355
JB_1028	Rana	1199	cerebellum	Possible HIV Associated Dementia	37721	Hypoxic or ischemic damage, Other non-infectious pathology	PWH	0	7636	1198	292	9149402	0.973	0.483	0.973	0.905	0.967	0.951	0.915	0.035	0.499	0.381	0.771	0.091	0.942	34521	1542
JB_1028_2	Rana	1199	cerebellum	~	~	~	PWH	0	8787	36233	1017	318380906	0.969	0.927	0.914	0.922	0.918	0.955	0.923	0.035	0.497	0.391	0.717	0.052	0.908	21506	325
JB_1048_2	Rana	1199	cerebellum	~	~	~	PWH	0	4981	1531	255	7627509	0.95	0.603	0.938	0.843	0.934	0.934	0.817	0.024	0.382	0.412	0.743	0.051	0.884	25275	487
JB_1050_2	Rana	1199	cerebellum	~	~	~	PWH	0	7750	5010	367	38830403	0.954	0.813	0.94	0.861	0.935	0.954	0.842	0.022	0.342	0.477	0.739	0.048	0.42	32101	757
JB_1066_2	Rana	1233	cerebellum	Possible HIV Associated Dementia	(Missing)	Arteriolar wall thickening suggestive of chronic hypertension, Focal (territorial) infarct, Hypoxic or ischemic damage, Other non-infectious pathology	PWH	0	5715	39155	349	223770791	0.962	0.919	0.958	0.916	0.953	0.955	0.817	0.023	0.112	0.681	0.558	0.067	0.886	43007	5354
NNAB2001Fm_GEX_MAH	Ho	2001	frontal cortex & WM BA9	Unable to reliably assign neurocognitive diagnosis	525364	Hemorrhage-parenchymal, Other non-infectious pathology	PWH	0	5973	65707	2332	392466319	0.956	0.669	0.966	0.935	0.965	0.941	0.688	0.042	0.464	0.182	0.642	0.145	0.857	43872	4430
NNAB4013Fm_GEX_MAH	Ho	4013	frontal cortex & WM BA9	Probable HAD	<400	Alzheimer type 2 gliosis, Hemorrhage-dura or leptomeninges	PWH	0	6150	57844	2212	355743148	0.955	0.691	0.965	0.929	0.965	0.963	0.856	0.043	0.516	0.296	0.705	0.058	0.83	25590	246
JB_1029	Rana	4028	cerebellum	Possible HAD	>750000	No pathologies noted	PWH	0	5083	1527	176	7759845	0.977	0.651	0.969	0.883	0.962	0.889	0.817	0.041	0.236	0.541	0.722	0.061	0.831	33016	768
JB_1029_2	Rana	4028	cerebellum	~	~	~	PWH	0	5150	49309	528	253940365	0.97	0.967	0.904	0.919	0.907	0.901	0.839	0.043	0.237	0.56	0.709	0.152	0.914	38862	2430
JB_1067_2	Rana	4049	cerebellum	Possible HAD	18765	Other non-infectious pathology	PWH	0	10055	25582	1461	257228807	0.951	0.816	0.96	0.927	0.958	0.968	0.924	0.035	0.55	0.339	0.628	0.248	0.9	38990	3058
JB_1065_2	Rana	4056	cerebellum	Possible HAD	1019	Hypoxic or ischemic damage, Leukoencephalopathy	PWH	0	9955	24373	1709	242629866	0.932	0.7	0.959	0.928	0.957	0.97	0.932	0.032	0.588	0.312	0.48	0.051	0.915	44468	2030
4084INS	Spudich	4084	insular cortex	Neuropsychological Impairment or dementia due to other cause	40519	HIV Encephalitis	PWH	57	13990	21982	1280	307521927	0.924	0.437	0.95	0.932	0.944	0.948	0.587	0.036	0.399	0.153	0.283	0.035	0.742	39054	2167
4084PFC	Spudich	4084	prefrontal cortex	~	~	~	PWH	46	7662	52783	1298	404420620	0.916	0.692	0.961	0.948	0.957	0.946	0.359	0.027	0.222	0.11	0.697	0.073	0.928	44763	2908
4084VST	Spudich	4084	ventral striatum	~	~	~	PWH	11	14205	22079	1714	313637314	0.963	0.584	0.965	0.928	0.966	0.958	0.848	0.049	0.544	0.255	0.66	0.13	0.89	45657	6116
NNAB4170Fm_GEX_MAH	Ho	4170	frontal cortex & WM BA9	Probable MCMD	162670	Other infections, Other non-infectious pathology	PWH	0	9702	34231	2586	332109422	0.948	0.363	0.949	0.935	0.947	0.963	0.858	0.042	0.556	0.26	0.703	0.165	0.942	27572	291
JB_1030	Rana	6040	cerebellum	Probable HAD	(Missing)	Minimal non-diagnostic abnormalities	PWH	0	13332	707	247	9425733	0.965	0.236	0.972	0.904	0.965	0.961	0.929	0.034	0.601	0.294	0.704	0.168	0.946	37519	1607
JB_1030_2	Rana	6040	cerebellum	~	~	~	PWH	0	13737	22395	1047	307641310	0.96	0.864	0.912	0.92	0.916	0.963	0.933	0.034	0.601	0.298	0.701	0.157	0.922	37494	2543
JB_1055_2	Rana	6065	cerebellum	Possible MCMD	1043	Minimal non-diagnostic abnormalities	PWH	0	9554	35567	1481	339804622	0.958	0.866	0.945	0.867	0.941	0.958	0.922	0.037	0.618	0.267
NNAB6069Fm_GEX_MAH	Ho	6069	frontal cortex & WM BA9	Neuropsychological Impairment or dementia due to other cause	171497	No pathologies noted (normal)	PWH	0	14288	23984	2362	########	0.955	0.267	0.951	0.939	0.95	0.965	0.864	0.046	0.533	0.285	0.674	0.118	0.894	46007	5032
10061_HIVOUD_VST	Spudich	10061	ventral striatum	Probable HIV Associated Dementia	<50	Other non-infectious pathology	PWH	0	11532	40505	1732	467100482	0.947	0.692	0.965	0.952	0.962	0.943	0.725	0.046	0.508	0.171	0.679	0.054	0.866	43245	3864
10093_HIVOUD_VST2	Spudich	10093	ventral striatum	Asymptomatic Neurocognitive Impairment	9501	Other non-infectious pathology	PWH	0	15309	29350	1853	449319166	0.965	0.687	0.964	0.946	0.961	0.939	0.812	0.048	0.581	0.183	0.659	0.18	0.964	46930	4126
10127basalganglia	Corley	10127	basalganglia	Asymptomatic Neurocognitive Impairment	1013	Aseptic leptomeningitis	PWH	0	25834	23167	2011	598488867	0.933	0.58	0.953	0.951	0.961	0.962	0.907	0.042	0.635	0.231	0.595	0.206	0.938	47735	4192
10127hippocampus	Corley	10127	hippocampus	~	~	~	PWH	0	10921	48583	2045	530579591	0.925	0.6	0.953	0.955	0.965	0.956	0.869	0.043	0.621	0.204	0.717	0.079	0.945	44576	7349
HTVTYDSX7_D24-2379	Kellis	10131	Brodmann (1909) area 6	Neurocognitively normal; no significant impairment on NP testing	<50	Arteriolar wall thickening suggestive of chronic hypertension, Aseptic leptomeningitis, Atherosclerosis of major brain arteries, Sever atherosclerosis of major brain arteries, Focal (territorial) infarct, Other non-infectious pathology, Vascular siderocalcinosis	PWH	0	8734	35954	2949	314018024	0.973	0.543	0.968	0.949	0.966	0.948	0.88	0.055	0.634	0.191	0.707	0.063	0.937	44848	5576
HTVTYDSX7_D24-2388	Kellis	10131	insular cortex	~	~	~	PWH	0	9949	33173	2324	330040099	0.974	0.539	0.967	0.938	0.964	0.935	0.854	0.055	0.642	0.156	0.714	0.096	0.95	43919	6319
HTVTYDSX7_D24-2375	Kellis	10131	putamen	~	~	~	PWH	0	6965	39908	2713	277959256	0.968	0.628	0.967	0.946	0.964	0.956	0.896	0.057	0.646	0.193	0.597	0.059	0.936	43448	4888
10144_HIVOUD_VST	Spudich	10144	ventral striatum	Probable Mild Neurocognitive disorder	<20	Focal (territorial) infarct, Hypoxic or ischemic damage, Minimal non-diagnostic abnormalities	PWH	0	15988	26617	2064	425548322	0.963	0.547	0.963	0.94	0.961	0.932	0.721	0.038	0.535	0.148	0.631	0.061	0.834	39481	3887
HTVTYDSX7_D24-2377	Kellis	10147	Brodmann (1909) area 6	Probable Mild Neurocognitive disorder	<20	Other non-infectious pathology	PWH	0	4665	63584	1760	296620775	0.964	0.82	0.965	0.942	0.962	0.912	0.757	0.044	0.473	0.24	0.563	0.053	0.782	40440	5574
HTVTYDSX7_D24-2387	Kellis	10147	insular cortex	Probable Mild Neurocognitive disorder	<20	Other non-infectious pathology	PWH	0	4602	95306	2238	438596332	0.962	0.798	0.966	0.943	0.962	0.885	0.67	0.037	0.383	0.25	0.617	0.058	0.618	35377	5879
HTVTYDSX7_D24-2373	Kellis	10147	putamen	~	~	~	PWH	0	2273	116536	2454	264887300	0.961	0.826	0.966	0.943	0.964	0.928	0.734	0.043	0.367	0.324	0.722	0.107	0.966	44670	6277
HTVTYDSX7_D24-2378	Kellis	10214	Brodmann (1909) area 6	Neuropsychological Impairment - Other cause	<50	Alzheimer type 2 gliosis, Arteriolar wall thickening suggestive of chronic hypertension, Focal (territorial) infarct, Other non-infectious pathology, Vascular siderocalcinosis	PWH	0	8833	35821	2620	316406811	0.968	0.548	0.968	0.942	0.966	0.96	0.91	0.052	0.639	0.219	0.73	0.111	0.968	43633	5806
HTVTYDSX7_D24-2395	Kellis	10214	insular cortex	~	~	~	PWH	0	11471	20486	2732	234996852	0.968	0.447	0.968	0.949	0.965	0.965	0.919	0.049	0.591	0.28	0.724	0.083	0.938	42124	4733
HTVTYDSX7_D24-2374	Kellis	10214	putamen	~	~	~	PWH	0	7103	41122	2091	292091607	0.972	0.752	0.966	0.947	0.963	0.95	0.887	0.051	0.622	0.214	0.72	0.094	0.94	42559	7913
10266_HIVOUD_VST	Spudich	10266	ventral striatum	Neurocognitively normal; no significant impairment on NP testing	<20	Arteriolar wall thickening suggestive of chronic hypertension, Atherosclerosis of major brain arteries, Focal (territorial) infarct, Hemorrhage-dura or leptomeninges, Hemorrhage-parenchymal, Hypoxic or ischemic damage, Neurofibrillary pathology	PWH	0	9244	45488	2862	420489706	0.963	0.636	0.965	0.946	0.963	0.955	0.887	0.041	0.662	0.185	0.6	0.248	0.976	47468	3243
10269basalganglia	Corley	10269	basalganglia	Probable Mild Neurocognitive disorder	123	Arteriolar wall thickening suggestive of chronic hypertension, Atherosclerosis of major brain arteries, Neurofibrillary pathology ) Progressive multifocal leukoencephalopathy	PWH	1	21969	30610	1767	672462716	0.92	0.628	0.954	0.953	0.963	0.966	0.922	0.047	0.663	0.212	0.585	0.233	0.947	47742	3326
10269hippocampus	Corley	10269	hippocampus	~	~	~	PWH	1	15258	32185	1847	491078518	0.924	0.439	0.956	0.963	0.967	0.956	0.89	0.048	0.655	0.187	0.701	0.094	0.943	46952	4868
10280_HIV_PFC	Spudich	10280	prefrontal cortex	Unable to reliably assign neurocognitive diagnosis	109	Atherosclerosis of major brain arteries, Neurofibrillary pathology, Optic nerve atrophy/degeneration, Other non-infectious pathology, Vascular siderocalcinosis		0	21823	22328	2363	487269198	0.954	0.444	0.963	0.966	0.976	0.953	0.878	0.053	0.62	0.205	0.588	0.057	0.843	42612	3596
HTVTYDSX7_D24-2380	Kellis	10288	Brodmann (1909) area 6	Probable Mild Neurocognitive disorder	<20	Atherosclerosis of major brain arteries, Hemorrhage-dura or leptomeninges, Other non-infectious pathology, Vascular siderocalcinosis	PWH	0	8178	34696	1702	283742676	0.963	0.711	0.964	0.948	0.962	0.907	0.717	0.052	0.432	0.233	0.629	0.051	0.882	41286	4453
HTVTYDSX7_D24-2396	Kellis	10288	insular cortex	~	~	~	PWH	0	6365	42289	1969	269169709	0.968	0.737	0.967	0.948	0.963	0.902	0.755	0.053	0.465	0.237	0.499	0.067	0.732	40827	1903
HTVTYDSX7_D24-2376	Kellis	10288	putamen	~	~	~	PWH	0	6375	54128	853	345064714	0.945	0.845	0.964	0.941	0.961	0.911	0.637	0.058	0.292	0.287	0.7	0.053	0.959	41822	3782
HTVTYDSX7_D24-2389	Kellis	10301	Brodmann (1909) area 6	Neuropsychological Impairment - Other cause	<20	Arteriolar wall thickening suggestive of chronic hypertension, Atherosclerosis of major brain arteries, Sever atherosclerosis of major brain arteries, Focal (territorial) infarct, Neurofibrillary pathology, Other non-infectious pathology, Vascular siderocalcinosis	PWH	0	7741	32209	1813	249326854	0.979	0.616	0.968	0.93	0.964	0.898	0.839	0.056	0.633	0.15	0.738	0.088	0.969	43241	4682
HTVTYDSX7_D24-2397	Kellis	10301	insular cortex	~	~	~	PWH	0	7061	40972	2137	289302620	0.974	0.631	0.968	0.947	0.964	0.96	0.913	0.056	0.675	0.182	0.7	0.077	0.961	44005	7312
HTVTYDSX7_D24-2381	Kellis	10301	putamen	~	~	~	PWH	0	6851	49463	2760	338872588	0.972	0.616	0.965	0.937	0.964	0.925	0.866	0.058	0.638	0.169	0.743	0.057	0.948	42356	3744
HTVTYDSX7_D24-2392	Kellis	10304	Brodmann (1909) area 6	Neuropsychological Impairment - Other cause	21	Arteriolar wall thickening suggestive of chronic hypertension, Neurofibrillary pathology, Other non-infectious pathology, Senile plaque, Vascular siderocalcinosis	PWH	0	8962	33068	1795	296353134	0.978	0.638	0.967	0.947	0.964	0.943	0.887	0.055	0.645	0.186	0.739	0.082	0.962	42487	3682
HTVTYDSX7_D24-2400	Kellis	10304	insular cortex	~	~	~	PWH	0	8268	34665	1878	286612869	0.975	0.682	0.967	0.948	0.964	0.949	0.902	0.053	0.609	0.241	0.727	0.088	0.972	45052	5708
HTVTYDSX7_D24-2384	Kellis	10304	putamen	~	~	~	PWH	0	9015	49107	2323	442701436	0.974	0.648	0.969	0.94	0.966	0.95	0.904	0.058	0.667	0.179	0.572	0.261	0.966	47678	2743
20033basalganglia	Corley	20033	basalganglia	Neurocognitively normal; no significant impairment on NP testing	<50	No pathologies noted (normal)	PWH	0	22394	28613	1606	640757501	0.998	0.696	0.954	0.954	0.963	0.961	0.903	0.045	0.639	0.218	0.584	0.258	0.979	48593	2776
30022basalganglia	Corley	30022	basalganglia	Unable to reliably assign neurocognitive diagnosis	35702	No pathologies noted (normal)	PWH	0	44800	15192	1622	680594623	0.998	0.464	0.953	0.95	0.962	0.963	0.91	0.042	0.657	0.211	0.643	0.184	0.836	46900	4258
30022hippocampus	Corley	30022	hippocampus	~	~	~	PWH	0	15051	32363	2176	487091473	0.999	0.44	0.955	0.961	0.966	0.962	0.899	0.044	0.672	0.182	0.657	0.101	0.92	45835	3612
TNARC6766Fm_GEX_MAH	Ho	6800056766	frontal cortex & WM BA9	Probable MCMD	194984	No pathologies noted (normal)	PWH	0	17150	19556	1874	335384717	0.958	0.359	0.95	0.932	0.948	0.954	0.831	0.046	0.557	0.228	0.717	0.057	0.94	44490	5300
6800127569_HIVOUD_VST	Spudich	6800127569	ventral striatum	Probable HAD	>750000	HIV Encephalitis, Microglial nodule encephalitis	PWH	1466	14773	32134	2197	474717604	0.962	0.612	0.956	0.929	0.954	0.957	0.868	0.047	0.633	0.188	0.68	0.062	0.929	46331	4859
6800127569_HIVOUD_INS	Spudich	6800127569	insular cortex	~	~	~	PWH	46	15842	25019	2315	396354723	0.965	0.524	0.95	0.921	0.947	0.954	0.853	0.05	0.63	0.172	0.722	0.068	0.947	45023	4949
6800127569_HIVOUD_PFC	Spudich	6800127569	prefrontal cortex	~	~	~	PWH	0	19670	24017	2159	472404949	0.963	0.5	0.951	0.917	0.947	0.951	0.819	0.049	0.612	0.157
HC3K3DSX5_230207Kel_67	Kellis	6800576869	putamen	Probable CMVE	203330	Microglial nodule encephalitis	PWH	1	17474	14249	1248	248992044	0.962	0.568	0.951	0.916	0.946	0.951	0.865	0.055	0.585	0.225	0.701	0.081	0.909	40198	2184
HC3K3DSX5_230207Kel_43	Kellis	6800576869	Brodmann (1909) area 6	~	~	~	PWH	0	9239	25302	1932	233764216	0.955	0.506	0.951	0.913	0.946	0.962	0.897	0.046	0.523	0.329	0.679	0.102	0.952	43426	1897
HC3K3DSX5_230207Kel_55	Kellis	6800576869	insular cortex	~	~	~	PWH	0	6035	49593	1494	299291799	0.967	0.834	0.949	0.902	0.942	0.927	0.865	0.054	0.511	0.299	0.636	0.049	0.92	46633	3902
6800706867_HIVOUD_PFC	Spudich	6800706867	prefrontal cortex	Probable MCMD	<50	Focal (territorial) infarct	PWH	1	19119	18409	2216	351958156	0.965	0.412	0.955	0.925	0.951	0.951	0.853	0.057	0.636	0.16
6800706867_HIVOUD_INS	Spudich	6800706867	insular cortex	~	~	~	PWH	0	18486	22845	1991	422311394	0.969	0.437	0.949	0.921	0.945	0.934	0.767	0.054	0.559	0.154	0.639	0.05	0.943	44686	3720
6800706867_HIVOUD_VST	Spudich	6800706867	ventral striatum	~	~	~	PWH	0	17707	23525	1804	416564172	0.963	0.576	0.953	0.93	0.95	0.949	0.762	0.044	0.554	0.164	0.686	0.08	0.918	46207	4253
6801006868basalganglia	Corley	6801006868	basalganglia	Neurocognitively Normal	1655	Aseptic leptomeningitis, Hypoxic or ischemic damage	PWH	5	21894	26038	1812	570076784	0.937	0.677	0.956	0.95	0.963	0.966	0.912	0.045	0.628	0.239	0.642	0.124	0.949	48319	6497
6801006868occipital	Corley	6801006868	occipital	~	~	~	PWH	0	17992	37316	2599	671380983	0.922	0.533	0.956	0.955	0.964	0.958	0.832	0.041	0.613	0.179	0.635	0.109	0.916	46851	7316
6801066772_HIV_PFC	Spudich	6801066772	prefrontal cortex	Neuropsychological Impairment or dementia due to other cause	1391	Atherosclerosis of major brain arteries	PWH	2	11694	39730	2373	464597554	0.956	0.633	0.97	0.946	0.966	0.96	0.866	0.051	0.639	0.176	0.645	0.075	0.949	44381	4851
TNARC6772Fm_GEX_MAH	Ho	6801066772	frontal cortex & WM BA9	~	~	~	PWH	0	10894	31391	2994	341971213	0.951	0.319	0.95	0.932	0.949	0.949	0.816	0.046	0.544	0.226	0.676	0.112	0.958	45521	5252
6801066772_HIV_VST	Spudich	6801066772	ventral striatum	~	~	~	PWH	0	10791	32739	2010	353290330	0.964	0.628	0.97	0.954	0.971	0.947	0.794	0.047	0.59	0.157	0.587	0.064	0.903	41871	2418
6801187468_HIV_PFC	Spudich	6801187468	prefrontal cortex	(Missing)	441668	Bacterial parenchymal infection, Focal (territorial) infarct	PWH	11	17041	37293	2383	635508344	0.949	0.62	0.969	0.948	0.964	0.953	0.755	0.044	0.538	0.173
6801187468_HIV_VST	Spudich	6801187468	ventral striatum	~	~	~	PWH	0	15588	21692	1405	338139284	0.962	0.727	0.96	0.927	0.957	0.904	0.732	0.055	0.533	0.144	0.624	0.061	0.945	45892	5698
HC3K3DSX5_230207Kel_37	Kellis	7100118382	Brodmann (1909) area 6	Probable MCMD	<400	No pathologies noted	PWH	0	10829	21030	1690	227735790	0.965	0.432	0.951	0.91	0.945	0.956	0.906	0.046	0.531	0.329	0.734	0.085	0.95	41249	2110
HC3K3DSX5_230207Kel_49	Kellis	7100118382	insular cortex	~	~	~	PWH	0	7349	39453	1333	289936913	0.971	0.726	0.951	0.921	0.944	0.942	0.897	0.049	0.523	0.325	0.72	0.087	0.957	43007	2135
HC3K3DSX5_230207Kel_61	Kellis	7100118382	putamen	~	~	~	PWH	0	9513	27466	1245	261284653	0.968	0.612	0.95	0.918	0.944	0.953	0.891	0.054	0.633	0.205	0.505	0.041	0.89	42855	4947
7100518287_HIV_PFC	Spudich	7100518287	prefrontal cortex	(Missing)	(Missing)	Focal (territorial) infarct, Other non-infectious pathology, Thrombus or thromboembolus	PWH	0	8751	46438	2134	406377929	0.965	0.663	0.964	0.941	0.961	0.952	0.607	0.041	0.436	0.13	0.364	0.044	0.795	39257	2344
7100518287_HIV_VST	Spudich	7100518287	ventral striatum	~	~	~	PWH	0	6931	46696	1329	323646644	0.963	0.724	0.96	0.914	0.957	0.875	0.468	0.043	0.335	0.089	0.691	0.101	0.946	46141	4915
TNARC6868Fm_GEX_MAH	Ho	7100626868	frontal cortex & WM BA9	Neuropsychological Impairment; does not meet criteria for syndromic disorder	249	Alzheimer type 2 gliosis	PWH	0	14298	25309	2196	361872105	0.961	0.355	0.951	0.939	0.95	0.962	0.872	0.052	0.623	0.197	0.716	0.09	0.909	43192	3510
HC3K3DSX5_230207Kel_38	Kellis	7100686683	Brodmann (1909) area 6	Probable MCMD	483758	No pathologies noted	PWH	0	11443	21532	1897	246395129	0.958	0.459	0.953	0.921	0.948	0.957	0.877	0.044	0.48	0.354	0.725	0.073	0.878	40961	2822
HC3K3DSX5_230207Kel_50	Kellis	7100686683	insular cortex	~	~	~	PWH	0	8609	39876	1757	343289907	0.969	0.764	0.952	0.913	0.945	0.918	0.863	0.039	0.354	0.471	0.671	0.08	0.91	42649	2718
HC3K3DSX5_230207Kel_62	Kellis	7100686683	putamen	~	~	~	PWH	0	10708	23397	1537	250532486	0.963	0.649	0.951	0.922	0.945	0.941	0.831	0.052	0.532	0.246	0.71	0.067	0.942	43380	4380
HC3K3DSX5_230207Kel_44	Kellis	7100876869	Brodmann (1909) area 6	Neurocognitively Normal	<500	Minimal non-diagnostic abnormalities, Other non-infectious pathology	PWH	0	8824	28869	2132	254742577	0.966	0.49	0.949	0.926	0.944	0.951	0.863	0.057	0.583	0.223	0.689	0.06	0.893	42340	2507
HC3K3DSX5_230207Kel_56	Kellis	7100876869	insular cortex	~	~	~	PWH	0	11936	27650	1600	330033915	0.971	0.747	0.949	0.922	0.942	0.926	0.833	0.057	0.473	0.304	0.668	0.08	0.937	41698	3365
HC3K3DSX5_230207Kel_68	Kellis	7100876869	putamen	~	~	~	PWH	0	7701	30471	1821	234655646	0.966	0.721	0.951	0.912	0.943	0.942	0.843	0.065	0.59	0.188	0.721	0.067	0.937	41572	4095
HC3K3DSX5_230207Kel_39	Kellis	7101236568	Brodmann (1909) area 6	Neurocognitively Normal	<500	No pathologies noted	PWH	0	6640	36911	1810	245087876	0.969	0.63	0.951	0.914	0.944	0.944	0.875	0.058	0.622	0.195	0.649	0.055	0.859	37146	2326
HC3K3DSX5_230207Kel_51	Kellis	7101236568	insular cortex	~	~	~	PWH	0	4535	65136	1395	295389913	0.969	0.893	0.949	0.918	0.941	0.855	0.783	0.055	0.449	0.279	0.693	0.071	0.894	38850	2856
HC3K3DSX5_230207Kel_63	Kellis	7101236568	putamen	~	~	~	PWH	0	6024	43549	1474	262338515	0.969	0.839	0.95	0.915	0.944	0.927	0.846	0.054	0.583	0.209	0.706	0.114	0.925	43667	1272
7101847783_HIV_PFC	Spudich	7101847783	prefrontal cortex	(Missing)	330	Focal (territorial) infarct	PWH	0	30906	15725	961	485987352	0.965	0.745	0.967	0.948	0.962	0.954	0.907	0.057	0.632	0.218	0.706	0.111	0.971	46094	4916
7101847783_HIV_VST	Spudich	7101847783	ventral striatum	~	~	~	PWH	0	19391	19543	2405	378957885	0.968	0.388	0.974	0.957	0.974	0.964	0.911	0.063	0.687	0.161	0.59	0.055	0.774	43942	1861
HC3K3DSX5_230207Kel_45	Kellis	7101948280	Brodmann (1909) area 6	Possible MCMD	<40	No pathologies noted	PWH	0	15596	18468	1139	288022565	0.956	0.585	0.95	0.921	0.943	0.923	0.715	0.048	0.392	0.275	0.716	0.074	0.922	40628	2608
HC3K3DSX5_230207Kel_57	Kellis	7101948280	insular cortex	~	~	~	PWH	0	7404	36727	1619	271924499	0.97	0.764	0.95	0.907	0.942	0.932	0.874	0.056	0.486	0.332	0.677	0.067	0.917	40758	2472
HC3K3DSX5_230207Kel_69	Kellis	7101948280	putamen	~	~	~	PWH	0	7895	36620	1402	289114676	0.969	0.813	0.951	0.925	0.945	0.933	0.838	0.065	0.569	0.204	0.574	0.091	0.902	43578	3556
7102096765basalganglia	Corley	7102096765	basalganglia	(Missing)	241693	Contusion, Focal (territorial) infarct, Optic nerve atrophy/degeneration	PWH	0	9826	36341	1846	357091077	0.94	0.758	0.955	0.954	0.962	0.942	0.745	0.058	0.484	0.204	0.361	0.066	0.843	49716	4946
7102096765occipital	Corley	7102096765	occipital	~	~	~	PWH	0	11571	59880	2249	692876561	0.907	0.558	0.951	0.95	0.96	0.94	0.485	0.043	0.326	0.116	0.431	0.034	0.913	44018	4648
7102096765_HIV_PFC	Spudich	7102096765	prefrontal cortex	~	~	~	PWH	0	9012	53217	2237	479591986	0.942	0.647	0.966	0.941	0.961	0.957	0.526	0.041	0.369	0.116	0.613	0.062	0.951	46624	9899
7102096765_HIV_VST	Spudich	7102096765	ventral striatum	~	~	~	PWH	0	10327	43147	3457	445582756	0.963	0.508	0.972	0.956	0.972	0.946	0.757	0.055	0.558	0.144	0.698	0.11	0.952	41609	3162
HC3K3DSX5_230207Kel_64	Kellis	7102316875	putamen	Neuropsychological Impairment or dementia due to other cause	1015	Minimal non-diagnostic abnormalities	PWH	4	9225	26115	1673	240908027	0.962	0.693	0.951	0.917	0.945	0.949	0.883	0.046	0.566	0.271	0.713	0.119	0.918	44227	3756
HC3K3DSX5_230207Kel_40	Kellis	7102316875	Brodmann (1909) area 6	~	~	~	PWH	0	10098	26437	2040	266964519	0.96	0.441	0.95	0.914	0.945	0.965	0.903	0.042	0.53	0.33	0.718	0.084	0.873	39947	2701
HC3K3DSX5_230207Kel_52	Kellis	7102316875	insular cortex	~	~	~	PWH	0	5003	77073	1712	385594102	0.969	0.866	0.951	0.919	0.943	0.929	0.873	0.043	0.436	0.394	0.719	0.127	0.925	44179	2883
HC3K3DSX5_230207Kel_41	Kellis	7102536771	Brodmann (1909) area 6	Neuropsychological Impairment; does not meet criteria for syndromic disorder	157009	No pathologies noted	PWH	0	15536	17522	1646	272223215	0.956	0.413	0.952	0.915	0.947	0.968	0.918	0.042	0.501	0.374	0.725	0.125	0.927	44039	2933
HC3K3DSX5_230207Kel_53	Kellis	7102536771	insular cortex	~	~	~	PWH	0	15405	16703	1678	257312453	0.957	0.406	0.952	0.919	0.946	0.97	0.92	0.041	0.477	0.402	0.697	0.117	0.955	42702	3081
HC3K3DSX5_230207Kel_65	Kellis	7102536771	putamen	~	~	~	PWH	0	10997	17304	1577	190291087	0.952	0.409	0.951	0.913	0.945	0.962	0.894	0.051	0.642	0.201	0.719	0.081	0.934	43596	3776
HC3K3DSX5_230207Kel_42	Kellis	7102547787	Brodmann (1909) area 6	Possible HAD	17387	No pathologies noted	PWH	0	12069	19710	1917	237874746	0.962	0.496	0.952	0.913	0.946	0.96	0.876	0.048	0.537	0.291	0.728	0.096	0.946	43609	6135
HC3K3DSX5_230207Kel_54	Kellis	7102547787	insular cortex	~	~	~	PWH	0	8365	33303	2757	278580728	0.962	0.601	0.952	0.911	0.946	0.961	0.906	0.053	0.565	0.288	0.649	0.054	0.899	41598	2718
HC3K3DSX5_230207Kel_66	Kellis	7102547787	putamen	~	~	~	PWH	0	8477	19830	1407	168096559	0.965	0.532	0.95	0.906	0.944	0.932	0.784	0.054	0.525	0.205	0.666	0.079	0.848	41015	11264
TNARC6980Fm_GEX_MAH	Ho	7102816980	frontal cortex & WM BA9	Neuropsychological Impairment - Other cause	<40	Focal (territorial) infarct, Hypoxic or ischemic damage, Minimal non-diagnostic abnormalities, Neurofibrillary pathology, Senile plaque	PWH	0	1598	198922	3832	317877215	0.959	0.79	0.948	0.93	0.947	0.954	0.816	0.045	0.549	0.222	0.607	0.245	0.967	47439	3564
7102847472basalganglia	Corley	7102847472	basalgangia	Neurocognitively Normal	<500	CNS Neoplasm other than lymphoreticular, Hypoxic or ischemic damage, Minimal non-diagnostic abnormalities	PWH	0	15910	39301	1834	625275706	0.924	0.684	0.956	0.943	0.964	0.965	0.926	0.05	0.651	0.226	0.611	0.146	0.938	49091	6123
7102847472occipital	Corley	7102847472	occipital	~	~	~	PWH	0	17267	35169	2536	607255036	0.922	0.456	0.956	0.952	0.965	0.952	0.824	0.044	0.589	0.191	0.692	0.064	0.912	43679	6843
HC3K3DSX5_230207Kel_46	Kellis	7200498383	Brodmann (1909) area 6	Neurocognitively Normal	<20	Arteriolar wall thickening suggestive of chronic hypertension, Atherosclerosis of major brain arteries, Sever atherosclerosis of major brain arteries, Minimal non-diagnostic abnormalities, Neurofibrillary pathology, Optic nerve atrophy/degeneration, Other non-infectious pathology, Senile plaque	PWH	0	7711	46885	2782	361527590	0.964	0.615	0.951	0.924	0.945	0.948	0.839	0.055	0.603	0.181	0.696	0.07	0.894	39225	2919
HC3K3DSX5_230207Kel_58	Kellis	7200498383	insular cortex	~	~	~	PWH	0	5569	51564	1764	287161641	0.966	0.856	0.949	0.92	0.941	0.926	0.852	0.058	0.534	0.26	0.697	0.086	0.952	42155	5046
HC3K3DSX5_230207Kel_70	Kellis	7200498383	putamen	~	~	~	PWH	0	6778	37412	2424	253578366	0.966	0.68	0.951	0.915	0.945	0.947	0.873	0.059	0.631	0.183	0.64	0.164	0.909	46694	4414
TNARC7480Fm_GEX_MAH	Ho	7200537480	frontal cortex & WM BA9	Possible HAD	40133	Atherosclerosis of major brain arteries	PWH	0	14706	25469	2262	374542209	0.952	0.432	0.952	0.938	0.95	0.965	0.875	0.045	0.507	0.323	0.649	0.155	0.967	49249	2829
7200597771basalganglia	Corley	7200597771	basalganglia	Neurocognitively Normal	12800	Bacterial parenchymal infection	PWH	12	27190	33926	1668	922456128	0.939	0.748	0.956	0.951	0.963	0.962	0.887	0.056	0.614	0.218	0.592	0.159	0.946	49712	9052
7200597771occipital	Corley	7200597771	occipital	~	~	~	PWH	1	13481	64371	3422	867783076	0.916	0.56	0.956	0.955	0.966	0.955	0.823	0.048	0.598	0.176	0.688	0.092	0.782	41583	1578
7200776574_HIV_PFC	Spudich	7200776574	prefrontal cortex	Neuropsychological Impairment or dementia due to other cause	10613	No pathologies noted	PWH	2	12184	26558	1788	323578804	0.945	0.553	0.966	0.952	0.962	0.961	0.889	0.049	0.653	0.188
7200776574_HIV_VST	Spudich	7200776574	ventral striatum	~	~	~	PWH	0	13139	20859	1068	274063365	0.966	0.694	0.965	0.924	0.961	0.934	0.86	0.049	0.648	0.164	0.631	0.183	0.951	45046	3379
7200848468basalganglia	Corley	7200848468	basalganglia	Neurocognitively Normal	205	Alzheimer type 2 gliosis	PWH	0	20619	37827	1625	779952161	0.999	0.678	0.957	0.953	0.965	0.97	0.927	0.054	0.613	0.26	0.678	0.17	0.973	46347	5312
7200848468choroid	Corley	7200848468	choroid	~	~	~	PWH	0	22038	25459	2528	561055366	0.998	0.607	0.952	0.954	0.961	0.966	0.913	0.037	0.636	0.24	0.626	0.18	0.972	49613	4863
7200848468occipital	Corley	7200848468	occipital	~	~	~	PWH	0	31045	24215	2423	751751704	0.999	0.397	0.957	0.954	0.966	0.96	0.884	0.052	0.635	0.197	0.75	0.097	0.951	42280	3762
HC3K3DSX5_230207Kel_47	Kellis	7201068268	Brodmann (1909) area 6	Neurocognitively normal; no significant impairment on NP testing	151	Focal (territorial) infarct	PWH	0	8314	28094	1854	233575528	0.965	0.538	0.95	0.918	0.945	0.964	0.917	0.04	0.552	0.326	0.747	0.094	0.956	43209	5451
HC3K3DSX5_230207Kel_59	Kellis	7201068268	insular cortex	~	~	~	PWH	0	9499	28072	2442	266656332	0.968	0.529	0.952	0.922	0.946	0.963	0.919	0.047	0.623	0.248	0.719	0.117	0.968	43216	4569
HC3K3DSX5_230207Kel_71	Kellis	7201068268	putamen	~	~	~	PWH	0	9143	28339	2008	259105895	0.96	0.507	0.951	0.919	0.946	0.959	0.917	0.052	0.689	0.175	0.745	0.086	0.951	42190	4328
HC3K3DSX5_230207Kel_48	Kellis	7201237482	Brodmann (1909) area 6	Neurocognitively normal; no significant impairment on NP testing	<40	Hemorrhage-dura or leptomeninges, Hemorrhage-parenchymal, Minimal non-diagnostic abnormalities, Other non-infectious pathology	PWH	0	9642	16826	2144	162237861	0.966	0.377	0.95	0.921	0.944	0.966	0.906	0.046	0.571	0.289	0.726	0.116	0.94	44430	5856
HC3K3DSX5_230207Kel_60	Kellis	7201237482	insular cortex	~	~	~	PWH	0	11830	21672	2753	256378147	0.96	0.406	0.952	0.917	0.947	0.966	0.916	0.044	0.547	0.324	0.654	0.164	0.368	39490	2256
HC3K3DSX5_230207Kel_72	Kellis	7201237482	putamen	~	~	~	PWH	0	5572	46226	1326	257572027	0.927	0.426	0.951	0.918	0.947	0.961	0.898	0.052	0.674	0.172	0.472	0.059	0.773	36861	2272
HTVTYDSX7_D24-2382	Kellis	MHBB634	putamen	(Missing)	(Missing)	Aseptic leptomeningitis, Atherosclerosis of major brain arteries, Neurofibrillary pathology, Other non-infectious pathology	PWH	0	2942	59899	1213	176222644	0.965	0.763	0.965	0.92	0.962	0.806	0.609	0.06	0.395	0.154	0.551	0.05	0.882	40913	4042
HTVTYDSX7_D24-2390	Kellis	MHBB634	Brodmann (1909) area 6	~	~	~	PWH	0	8224	37881	1784	311530601	0.973	0.703	0.966	0.913	0.962	0.788	0.672	0.052	0.435	0.186	0.609	0.072	0.753	38460	2627
HTVTYDSX7_D24-2398	Kellis	MHBB634	insular cortex	~	~	~	PWH	0	3091	82564	1388	255204235	0.959	0.892	0.967	0.949	0.964	0.909	0.765	0.063	0.464	0.238	0.615	0.064	0.905	39568	2460
HTVTYDSX7_D24-2383	Kellis	MHBB678	putamen	(Missing)	<50	Alzheimer type 2 gliosis, Arteriolar wall thickening suggestive of chronic hypertension, Vascular siderocalcinosis	PWH	0	6181	64989	1370	401695603	0.969	0.871	0.967	0.942	0.963	0.887	0.756	0.051	0.503	0.202	0.569	0.052	0.865	42152	4056
HTVTYDSX7_D24-2391	Kellis	MHBB678	Brodmann (1909) area 6	~	~	~	PWH	0	9192	26567	1956	244200309	0.975	0.573	0.967	0.92	0.963	0.804	0.701	0.057	0.448	0.196	0.689	0.073	0.798	37366	2852
HTVTYDSX7_D24-2399	Kellis	MHBB678	insular cortex	~	~	~	PWH	0	3515	83198	1569	292439722	0.966	0.905	0.967	0.946	0.964	0.949	0.847	0.059	0.519	0.27	0.643	0.05	0.914	40025	5785
HTVTYDSX7_D24-2385	Kellis	MHBB777	putamen	(Missing)	<20	No pathologies noted	PWH	0	2546	127655	2338	325010195	0.972	0.856	0.967	0.938	0.964	0.886	0.77	0.052	0.555	0.164	0.746	0.063	0.954	43279	5768
HTVTYDSX7_D24-2393	Kellis	MHBB777	Brodmann (1909) area 6	~	~	~	PWH	0	7572	43425	2570	328816853	0.975	0.623	0.969	0.95	0.965	0.951	0.891	0.053	0.583	0.255	0.7	0.059	0.912	42164	3701
HTVTYDSX7_D24-2401	Kellis	MHBB777	insular cortex	~	~	~	PWH	0	8745	30629	1853	267849868	0.972	0.718	0.966	0.941	0.962	0.922	0.836	0.051	0.521	0.263	0.715	0.103	0.97	45445	8664
HTVTYDSX7_D24-2386	Kellis	MHBB783	putamen	(Missing)	33	Arteriolar wall thickening suggestive of chronic hypertension, CNS Neoplasm other than lymphoreticular, Hemorrhage-parenchymal, Hypoxic or ischemic damage, Other non-infectious pathology, Vascular siderocalcinosis	PWH	1	8425	55826	3142	470333152	0.97	0.593	0.969	0.947	0.966	0.954	0.904	0.057	0.634	0.213	0.718	0.067	0.948	42953	3052
HTT7WDSX7_D24-2402	Kellis	MHBB783	insular cortex	~	~	~	PWH	0	10614	22599	1652	239864307	0.977	0.571	0.959	0.942	0.957	0.934	0.873	0.059	0.585	0.23	0.733	0.068	0.937	42952	5462
HTVTYDSX7_D24-2394	Kellis	MHBB783	Brodmann (1909) area 6	~	~	~	PWH	0	6829	41759	2400	285169460	0.974	0.602	0.968	0.947	0.964	0.95	0.886	0.056	0.576	0.254	0.603	0.213	0.937	48387	3531
mhbb800hippocampus	Corley	mhbb800	hippocampus	(Missing)	41	Focal (territorial) infarct, Hypoxic or ischemic damage, Other non-infectious pathology, Vascular siderocalcinosis	PWH	2	15425	35927	1932	554166976	0.928	0.523	0.953	0.96	0.965	0.958	0.891	0.049	0.65	0.191	0.568	0.279	0.974	47971	2750
mhbb800basalganglia	Corley	mhbb800	basalganglia	~	~	~	PWH	0	22073	33452	1580	738384477	0.914	0.603	0.952	0.952	0.961	0.966	0.924	0.054	0.644	0.226	0.61	0.197	0.91	46257	6102
156 specimens	5 labs	73 subjects						Total	1885561														0.648032	0.0963228	0.900462	42153.4	3808.02
5 assayed in duplicate - 4 twice, 1 four times								Mean	11567.9	36064.6	1824.24	3.52722e+08	0.958638	0.619221	0.957067	0.931577	0.955362	0.944123	0.818767	0.0470859	0.535282	0.23638	0.6785	0.08	0.923	43209.5	3647
								Median	9826	32185	1813	3.1904e+08	0.963	0.615	0.956	0.936	0.961	0.954	0.862	0.047	0.558	0.216
								22	Specimens with HIV+ RNA
								17	Subjects with HIV+ RNA
								1739	Total infected cells

## Sheet: HIV detected
Sample ID	Lab	subject_ID	anatomical_site	Cognitive_status	Last Viral load	Brain_pathology	HIV Status	HIV-infected cell count	Estimated Number of Cells	Mean Reads per Cell	Median Genes per Cell
NNAB1004Fm_GEX_MAH	Ho	1004	frontal cortex & WM BA9	Probable HAD	359458	Minimal non-diagnostic abnormalities, Other non-infectious pathology	PWH	3	6077	52608	2182
1039PFC	Spudich	1039	prefrontal cortex	Neuropsychological Impairment; does not meet criteria for syndromic disorder	1000000	HIV Encephalitis, Progressive multifocal leukoencephalopathy	PWH	10	21778	15328	1270
1133_HIVOUD_PFC_MAH	Spudich	1133	prefrontal cortex	(Missing)	184000	Minimal non-diagnostic abnormalities	PWH	1	17438	27857	1684
1181VST	Spudich	1181	ventral striatum	Neuropsychological Impairment or dementia due to other cause	528	Other infections, Other non-infectious pathology	PWH	55	6782	56982	687
4084INS	Spudich	4084	insular cortex	Neuropsychological Impairment or dementia due to other cause	40519	HIV Encephalitis	PWH	57	13990	21982	1280
4084PFC	Spudich	4084	prefrontal cortex	~	~	~	PWH	46	7662	52783	1298
4084VST	Spudich	4084	ventral striatum	~	~	~	PWH	11	14205	22079	1714
10269basalganglia	Corley	10269	basalganglia	Probable Mild Neurocognitive disorder	123	Arteriolar wall thickening suggestive of chronic hypertension, Atherosclerosis of major brain arteries, Neurofibrillary pathology ) Progressive multifocal leukoencephalopathy	PWH	1	21969	30610	1767
10269hippocampus	Corley	10269	hippocampus	~	~	~	PWH	1	15258	32185	1847
6800127569_HIVOUD_VST	Spudich	6800127569	ventral striatum	Probable HAD	>750000	HIV Encephalitis, Microglial nodule encephalitis	PWH	1466	14773	32134	2197
6800127569_HIVOUD_INS	Spudich	6800127569	insular cortex	~	~	~	PWH	46	15842	25019	2315
HC3K3DSX5_230207Kel_67	Kellis	6800576869	putamen	Probable CMVE	203330	Microglial nodule encephalitis	PWH	1	17474	14249	1248
6800706867_HIVOUD_PFC	Spudich	6800706867	prefrontal cortex	Probable MCMD	<50	Focal (territorial) infarct	PWH	1	19119	18409	2216
6801006868basalganglia	Corley	6801006868	basalganglia	Neurocognitively Normal	1655	Aseptic leptomeningitis, Hypoxic or ischemic damage	PWH	5	21894	26038	1812
6801066772_HIV_PFC	Spudich	6801066772	prefrontal cortex	Neuropsychological Impairment or dementia due to other cause	1391	Atherosclerosis of major brain arteries	PWH	2	11694	39730	2373
6801187468_HIV_PFC	Spudich	6801187468	prefrontal cortex	(Missing)	441668	Bacterial parenchymal infection, Focal (territorial) infarct	PWH	11	17041	37293	2383
HC3K3DSX5_230207Kel_64	Kellis	7102316875	putamen	Neuropsychological Impairment or dementia due to other cause	1015	Minimal non-diagnostic abnormalities	PWH	4	9225	26115	1673
7200597771basalganglia	Corley	7200597771	basalganglia	Neurocognitively Normal	12800	Bacterial parenchymal infection	PWH	12	27190	33926	1668
7200597771occipital	Corley	7200597771	occipital	~	~	~	PWH	1	13481	64371	3422
7200776574_HIV_PFC	Spudich	7200776574	prefrontal cortex	Neuropsychological Impairment or dementia due to other cause	10613	No pathologies noted	PWH	2	12184	26558	1788
HTVTYDSX7_D24-2386	Kellis	MHBB783	putamen	(Missing)	33	Arteriolar wall thickening suggestive of chronic hypertension, CNS Neoplasm other than lymphoreticular, Hemorrhage-parenchymal, Hypoxic or ischemic damage, Other non-infectious pathology, Vascular siderocalcinosis	PWH	1	8425	55826	3142
mhbb800hippocampus	Corley	MHBB800	hippocampus	(Missing)	41	Focal (territorial) infarct, Hypoxic or ischemic damage, Other non-infectious pathology, Vascular siderocalcinosis	PWH	2	15425	35927	1932
								Total	328926
								Mean	14951.2	34000.4	1904.45
								Median	15015.5	31372	1800
								22	Specimens with HIV+ RNA
								17	Subjects with HIV+ RNA
								1739	Total infected cells

## Sheet: PWoH
Sample ID	Lab	Subject ID	Anatomical_site	HIV Status	HIV-infected cell count	Estimated Number of Cells	Mean Reads per Cell	Median Genes per Cell	Number of Reads	Valid Barcodes	Sequencing Saturation	Q30 Bases in Barcode	Q30 Bases in RNA Read	Q30 Bases in UMI	Reads Mapped to Genome	Reads Mapped Confidently to Genome	Reads Mapped Confidently to Intergenic Regions	Reads Mapped Confidently to Intronic Regions	Reads Mapped Confidently to Exonic Regions	Reads Mapped Confidently to Transcriptome	Reads Mapped Antisense to Gene	Fraction Reads in Cells	Total Genes Detected	Median UMI Counts per Cell
JB_1058_2	rana	3002	cerebellum	PWoH	0	18228	122725	2474	2237035842	0.952	0.915	0.943	0.903	0.938	0.968	0.93	0.034	0.592	0.304	0.693	0.177	0.939	44141	5494
JB_1068_2	rana	3039	cerebellum	PWoH	0	7490	36789	1750	275552878	0.935	0.759	0.959	0.931	0.956	0.97	0.924	0.042	0.491	0.39	0.629	0.228	0.764	38990	3074
3065occipital	Corley	3065	occipital	PWoH	0	9025	72943	2029	658314854	0.928	0.74	0.957	0.956	0.965	0.942	0.813	0.041	0.602	0.17	0.615	0.131	0.857	45721	5122
7102417477basalganglia	Corley	7102417477	basalganglia	PWoH	0	13562	40196	1458	545137334	0.943	0.851	0.955	0.947	0.962	0.964	0.873	0.056	0.572	0.245	0.672	0.119	0.912	46283	2738
7102417477occipital	Corley	7102417477	occipital	PWoH	0	10095	42347	2371	427492489	0.924	0.458	0.954	0.95	0.962	0.942	0.621	0.04	0.437	0.144	0.497	0.066	0.839	45334	6785
H37LMDSX5_NNTC_7102447782_BA6-FC	kellis	7102447782	Brodmann (1909) area 6	PWoH	0	3659	118658	1820	434169170	0.799	0.813	0.972	0.935	0.966	0.929	0.87	0.056	0.689	0.125	0.458	0.335	0.903	44165	3433
H37LMDSX5_NNTC_7102447782_Insula	kellis	7102447782	insular cortex	PWoH	0	9750	60114	2040	586111399	0.772	0.719	0.974	0.94	0.967	0.928	0.871	0.057	0.689	0.125	0.452	0.341	0.876	47299	3722
HGC5HDMXY_NNTC_7102447782_Putamen	kellis	7102447782	putamen	PWoH	0	5343	73322	2874	391759563	0.968	0.526	0.965	0.941	0.962	0.956	0.834	0.046	0.622	0.166	0.679	0.08	0.924	44743	8748
H37LMDSX5_NNTC_7102477483_BA6-FC	kellis	7102477483	Brodmann (1909) area 6	PWoH	0	2660	232451	1516	618320780	0.778	0.93	0.971	0.932	0.964	0.898	0.737	0.062	0.542	0.132	0.373	0.284	0.653	43717	2352
H37LMDSX5_NNTC_7102477483_Insula	kellis	7102477483	insular cortex	PWoH	0	7791	67397	1595	525091296	0.8	0.804	0.971	0.929	0.965	0.888	0.795	0.068	0.6	0.127	0.401	0.308	0.828	49100	2406
HGC5HDMXY_NNTC_7102477483_Putamen	kellis	7102477483	putamen	PWoH	0	10420	35919	2394	374279454	0.974	0.433	0.964	0.951	0.961	0.953	0.804	0.051	0.593	0.16	0.672	0.052	0.879	45747	6420
H37LMDSX5_NNTC_7102667472_BA6-FC	kellis	7102667472	Brodmann (1909) area 6	PWoH	0	4452	115279	2018	513222733	0.806	0.767	0.973	0.942	0.967	0.947	0.903	0.059	0.697	0.147	0.473	0.35	0.804	44707	4462
H37LMDSX5_NNTC_7102667472_Insula	kellis	7102667472	insular cortex	PWoH	0	8204	47762	1728	391839175	0.822	0.677	0.974	0.934	0.969	0.945	0.901	0.066	0.708	0.128	0.462	0.353	0.879	45525	3048
HGC5HDMXY_NNTC_7102667472_Putamen	kellis	7102667472	putamen	PWoH	0	11374	27972	1822	318147991	0.959	0.429	0.966	0.947	0.964	0.966	0.911	0.06	0.668	0.183	0.693	0.126	0.953	45254	3802
H37LMDSX5_NNTC_7102687875_BA6-FC	kellis	7102687875	Brodmann (1909) area 6	PWoH	0	3000	154200	1936	462600451	0.785	0.839	0.974	0.935	0.968	0.934	0.88	0.06	0.671	0.149	0.456	0.344	0.787	43362	3990
H37LMDSX5_NNTC_7102687875_Insula	kellis	7102687875	insular cortex	PWoH	0	4449	289756	1164	1289125382	0.82	0.951	0.974	0.939	0.967	0.908	0.832	0.071	0.634	0.128	0.428	0.314	0.785	45613	1729
HGC5HDMXY_NNTC_7102687875_Putamen	kellis	7102687875	putamen	PWoH	0	8760	42186	2504	369545701	0.957	0.539	0.966	0.944	0.964	0.962	0.869	0.055	0.581	0.234	0.683	0.102	0.918	45640	5720
1702908282basalganglia	Corley	7102908282	basalganglia	PWoH	0	19244	36704	1642	706328099	0.921	0.686	0.958	0.954	0.965	0.966	0.922	0.054	0.631	0.237	0.59	0.253	0.97	48011	2859
1702908282hippo	Corley	7102908282	hippo	PWoH	0	14745	51500	1770	759369658	0.924	0.747	0.955	0.944	0.963	0.956	0.899	0.049	0.645	0.205	0.6	0.224	0.963	48973	3229
1702908282occipital	Corley	7102908282	occipital	PWoH	0	18855	44230	3074	833963307	0.908	0.496	0.955	0.947	0.964	0.954	0.862	0.046	0.598	0.218	0.581	0.211	0.953	49875	7124
H37LMDSX5_NNTC_7103187468_BA6-FC	kellis	7103187468	Brodmann (1909) area 6	PWoH	0	6644	66097	1148	439150285	0.803	0.805	0.974	0.934	0.967	0.892	0.804	0.066	0.609	0.13	0.408	0.313	0.765	46286	1664
H37LMDSX5_NNTC_7103187468_Insula	kellis	7103187468	insular cortex	PWoH	0	7586	50618	1258	383984701	0.806	0.78	0.972	0.939	0.966	0.907	0.756	0.065	0.558	0.134	0.384	0.29	0.891	47048	1820
HGC5HDMXY_NNTC_7103187468_Putamen	kellis	7103187468	putamen	PWoH	0	13006	32602	1564	424026174	0.958	0.487	0.964	0.943	0.96	0.944	0.662	0.049	0.426	0.187	0.548	0.042	0.893	45412	2906
H37LMDSX5_NNTC_7103377784_BA6-FC	kellis	7103377784	Brodmann (1909) area 6	PWoH	0	4772	70703	1548	337396998	0.79	0.699	0.974	0.945	0.967	0.937	0.887	0.057	0.715	0.115	0.463	0.346	0.858	43928	2699
H37LMDSX5_NNTC_7103377784_Insula	kellis	7103377784	insular cortex	PWoH	0	5964	85120	2180	507656081	0.826	0.779	0.973	0.946	0.966	0.943	0.883	0.058	0.691	0.135	0.464	0.341	0.865	45591	4042
HGC5HDMXY_NNTC_7103377784_Putamen	kellis	7103377784	putamen	PWoH	0	10400	37113	2208	385971901	0.971	0.438	0.967	0.938	0.965	0.96	0.884	0.056	0.652	0.175	0.721	0.074	0.937	45394	4922
H37LMDSX5_NNTC_7103458767_BA6-FC	kellis	7103458767	Brodmann (1909) area 6	PWoH	0	5160	119463	1582	616429219	0.788	0.795	0.972	0.941	0.967	0.945	0.894	0.051	0.726	0.118	0.465	0.359	0.95	45239	3040
H37LMDSX5_NNTC_7103458767_Insula	kellis	7103458767	insular cortex	PWoH	0	6470	61266	1590	396393267	0.808	0.722	0.972	0.934	0.966	0.919	0.869	0.056	0.708	0.104	0.452	0.341	0.889	45593	2880
HGC5HDMXY_NNTC_7103458767_Putamen	kellis	7103458767	putamen	PWoH	0	2752	161455	3232	444323392	0.969	0.668	0.966	0.942	0.964	0.956	0.8	0.048	0.591	0.161	0.653	0.072	0.922	43270	12916
H37LMDSX5_NNTC_7103476775_BA6-FC	kellis	7103476775	Brodmann (1909) area 6	PWoH	0	3345	121916	1476	407809132	0.774	0.81	0.973	0.94	0.967	0.923	0.833	0.065	0.64	0.128	0.425	0.325	0.867	44288	2536
H37LMDSX5_NNTC_7103476775_Insula	kellis	7103476775	insular cortex	PWoH	0	6916	57279	1294	396141334	0.793	0.725	0.973	0.938	0.966	0.915	0.812	0.064	0.628	0.12	0.413	0.317	0.827	46283	2029
HGC5HDMXY_NNTC_7103476775_Putamen	kellis	7103476775	putamen	PWoH	0	5076	80057	2966	406369399	0.97	0.579	0.963	0.935	0.96	0.95	0.744	0.054	0.525	0.164	0.605	0.059	0.925	44715	8698
H37LMDSX5_NNTC_7103486577_BA6-FC	kellis	7103486577	Brodmann (1909) area 6	PWoH	0	7078	62656	1460	443477247	0.782	0.69	0.973	0.947	0.967	0.948	0.882	0.052	0.695	0.135	0.462	0.348	0.927	45258	2704
H37LMDSX5_NNTC_7103486577_Insula	kellis	7103486577	insular cortex	PWoH	0	6005	83802	2089	503229962	0.826	0.757	0.974	0.939	0.968	0.936	0.884	0.056	0.713	0.116	0.461	0.347	0.85	45234	4240
HGC5HDMXY_NNTC_7103486577_Putamen	kellis	7103486577	putamen	PWoH	0	7260	50112	2282	363813894	0.964	0.5	0.963	0.936	0.96	0.956	0.654	0.042	0.447	0.165	0.543	0.048	0.837	44133	6018
HC3K3DSX5_230207Kel_3	Kellis	7103486577	Brodmann (1909) area 6	PWoH	0	9336	23227	1604	216845366	0.963	0.443	0.952	0.915	0.946	0.953	0.878	0.048	0.571	0.259	0.708	0.094	0.928	42829	2896
H37LMDSX5_NNTC_7103496566_BA6-FC	kellis	7103496566	Brodmann (1909) area 6	PWoH	0	7045	63111	1099	444615300	0.773	0.837	0.972	0.937	0.965	0.909	0.757	0.055	0.584	0.118	0.385	0.299	0.88	45772	1698
H37LMDSX5_NNTC_7103496566_Insula	kellis	7103496566	insular cortex	PWoH	0	9399	63047	1215	592575639	0.824	0.826	0.971	0.927	0.966	0.904	0.796	0.06	0.615	0.121	0.407	0.311	0.859	48003	1880
HGC5HDMXY_NNTC_7103496566_Putamen	kellis	7103496566	putamen	PWoH	0	7870	51653	1726	406507117	0.964	0.543	0.963	0.947	0.961	0.954	0.452	0.029	0.301	0.123	0.377	0.032	0.793	42539	4194
H37LMDSX5_NNTC_7103506866_BA6-FC	kellis	7103506866	Brodmann (1909) area 6	PWoH	0	7020	68506	1887	480909706	0.779	0.698	0.973	0.938	0.968	0.933	0.888	0.068	0.697	0.123	0.452	0.348	0.865	46878	3170
H37LMDSX5_NNTC_7103506866_Insula	kellis	7103506866	insular cortex	PWoH	0	5066	99219	2048	502644070	0.823	0.765	0.972	0.941	0.966	0.934	0.884	0.069	0.698	0.117	0.453	0.341	0.849	46026	3718
HGC5HDMXY_NNTC_7103506866_Putamen	kellis	7103506866	putamen	PWoH	0	6859	49936	2000	342511359	0.955	0.578	0.965	0.94	0.962	0.965	0.846	0.031	0.511	0.304	0.66	0.133	0.824	43102	4870
H37LMDSX5_NNTC_7103518472_BA6-FC	kellis	7103518472	Brodmann (1909) area 6	PWoH	0	4563	120860	1765	551484019	0.816	0.795	0.973	0.942	0.966	0.934	0.884	0.055	0.718	0.111	0.469	0.34	0.907	45310	3363
H37LMDSX5_NNTC_7103518472_Insula	kellis	7103518472	insular cortex	PWoH	0	6025	89618	1488	539950973	0.816	0.758	0.972	0.941	0.966	0.933	0.885	0.055	0.716	0.114	0.464	0.347	0.897	45336	2729
HGC5HDMXY_NNTC_7103518472_Putamen	kellis	7103518472	putamen	PWoH	0	24144	15902	1149	383934771	0.961	0.445	0.965	0.946	0.962	0.957	0.857	0.048	0.603	0.206	0.663	0.12	0.903	45175	1779
D24-3154	kellis	CA244	Brodmann (1909) area 6	PWoH	0	2119	152198	1561	322508329	0.952	0.76	0.956	0.945	0.952	0.864	0.323	0.026	0.139	0.158	0.266	0.023	0.606	35253	3578
D24-3159	kellis	CA244	insular cortex	PWoH	0	7387	37769	3174	279000134	0.961	0.48	0.961	0.949	0.958	0.938	0.858	0.047	0.45	0.36	0.689	0.096	0.879	44705	6618
D24-3164	kellis	CA244	putamen	PWoH	0	4393	46518	2403	204352111	0.967	0.569	0.961	0.944	0.957	0.906	0.777	0.048	0.444	0.285	0.637	0.067	0.878	42281	4770
D24-3155	kellis	CA405	Brodmann (1909) area 6	PWoH	0	6062	46013	2539	278933341	0.964	0.555	0.961	0.95	0.958	0.944	0.818	0.059	0.513	0.245	0.631	0.101	0.852	44792	4878
D24-3160	kellis	CA405	insular cortex	PWoH	0	7511	37576	1858	282236288	0.963	0.618	0.962	0.945	0.959	0.937	0.857	0.06	0.573	0.224	0.655	0.113	0.936	44053	3511
D24-3165	kellis	CA405	putamen	PWoH	0	7006	28845	1592	202091533	0.956	0.713	0.961	0.947	0.958	0.944	0.89	0.047	0.6	0.243	0.651	0.164	0.938	41585	2865
D24-3152	kellis	CE283	Brodmann (1909) area 6	PWoH	0	9251	19092	2253	176621673	0.952	0.313	0.959	0.938	0.957	0.948	0.822	0.043	0.536	0.244	0.639	0.116	0.908	43354	4618
D24-3157	kellis	CE283	insular cortex	PWoH	0	10523	25175	2037	264919851	0.952	0.407	0.959	0.95	0.957	0.952	0.756	0.044	0.501	0.211	0.598	0.091	0.9	44674	4219
D24-3162	kellis	CE283	putamen	PWoH	0	5259	42974	888	225999424	0.96	0.785	0.957	0.94	0.954	0.886	0.447	0.033	0.201	0.213	0.369	0.035	0.831	37609	1979
D24-3153	kellis	CE285	Brodmann (1909) area 6	PWoH	0	7021	43220	2575	303450720	0.962	0.583	0.957	0.942	0.955	0.927	0.8	0.051	0.523	0.226	0.631	0.093	0.904	44652	5674
D24-3158	kellis	CE285	insular cortex	PWoH	0	4412	49393	1313	217920679	0.96	0.683	0.958	0.949	0.956	0.934	0.651	0.046	0.434	0.172	0.531	0.053	0.848	40136	2305
D24-3163	kellis	CE285	putamen	PWoH	0	5195	37624	1478	195456055	0.962	0.795	0.96	0.94	0.958	0.923	0.784	0.049	0.542	0.193	0.618	0.091	0.923	38712	2615
D24-3151	kellis	CE290	Brodmann (1909) area 6	PWoH	0	6150	26330	2973	161928598	0.958	0.317	0.96	0.949	0.957	0.946	0.835	0.058	0.536	0.241	0.627	0.124	0.876	44113	5856
D24-3156	kellis	CE290	insular cortex	PWoH	0	6631	51255	2701	339869792	0.955	0.537	0.961	0.947	0.958	0.945	0.806	0.048	0.463	0.296	0.61	0.124	0.888	45710	5386
D24-3161	kellis	CE290	putamen	PWoH	0	5717	60430	2249	345479032	0.962	0.713	0.962	0.948	0.959	0.939	0.871	0.053	0.564	0.255	0.665	0.125	0.947	43520	4138
240229Kel_D24-3126	kellis	MHBB551	Brodmann (1909) area 6	PWoH	0	5622	29519	1712	165956982	0.967	0.53	0.964	0.957	0.96	0.951	0.779	0.044	0.489	0.247	0.65	0.059	0.907	40908	3148
240229Kel_D24-3136	kellis	MHBB551	insular cortex	PWoH	0	17493	13556	1462	237138837	0.95	0.268	0.965	0.959	0.962	0.963	0.812	0.044	0.542	0.226	0.663	0.079	0.924	44467	2602
240229Kel_D24-3146	kellis	MHBB551	putamen	PWoH	0	8827	21507	1351	189841856	0.953	0.556	0.959	0.944	0.956	0.925	0.666	0.038	0.39	0.238	0.558	0.049	0.84	40417	2193
240229Kel_D24-3121	kellis	MHBB581	Brodmann (1909) area 6	PWoH	0	5453	50921	3244	277674569	0.966	0.565	0.967	0.957	0.964	0.951	0.834	0.077	0.537	0.22	0.648	0.084	0.95	46542	8664
240229Kel_D24-3131	kellis	MHBB581	insular cortex	PWoH	0	6866	42909	3398	294615689	0.966	0.447	0.965	0.954	0.962	0.946	0.788	0.094	0.497	0.197	0.596	0.074	0.951	47964	9493
240229Kel_D24-3141	kellis	MHBB581	putamen	PWoH	0	2787	78480	2386	218722955	0.967	0.684	0.963	0.951	0.96	0.94	0.612	0.066	0.403	0.143	0.486	0.041	0.908	41475	6219
240229Kel_D24-3127	kellis	MHBB638	Brodmann (1909) area 6	PWoH	0	5302	25457	2458	134974575	0.958	0.452	0.966	0.953	0.963	0.96	0.887	0.053	0.614	0.22	0.699	0.107	0.935	41904	5646
240229Kel_D24-3137	kellis	MHBB638	insular cortex	PWoH	0	5503	59720	2760	328639018	0.958	0.615	0.965	0.949	0.962	0.96	0.832	0.051	0.605	0.176	0.669	0.085	0.956	44073	6970
240229Kel_D24-3147	kellis	MHBB638	putamen	PWoH	0	4222	45348	2588	191461337	0.967	0.637	0.96	0.949	0.957	0.939	0.813	0.056	0.582	0.175	0.663	0.066	0.922	41189	6160
240229Kel_D24-3122	kellis	MHBB654	Brodmann (1909) area 6	PWoH	0	5708	59087	3209	337268754	0.965	0.552	0.965	0.954	0.962	0.958	0.878	0.052	0.618	0.209	0.713	0.087	0.963	44556	9460
240229Kel_D24-3132	kellis	MHBB654	insular cortex	PWoH	0	7807	40003	3283	312302320	0.97	0.421	0.967	0.95	0.965	0.957	0.895	0.053	0.671	0.171	0.724	0.089	0.953	45082	9938
240229Kel_D24-3142	kellis	MHBB654	putamen	PWoH	0	2962	50737	2083	150282187	0.961	0.511	0.964	0.957	0.961	0.958	0.712	0.043	0.501	0.168	0.602	0.045	0.896	39826	5336
240229Kel_D24-3123	kellis	MHBB679	Brodmann (1909) area 6	PWoH	0	11977	18159	2294	217491026	0.962	0.276	0.966	0.952	0.963	0.968	0.908	0.056	0.611	0.242	0.713	0.11	0.951	44461	4705
240229Kel_D24-3133	kellis	MHBB679	insular cortex	PWoH	0	8429	35416	3304	298520873	0.956	0.409	0.966	0.957	0.964	0.968	0.905	0.052	0.576	0.277	0.68	0.147	0.947	45145	8355
240229Kel_D24-3143	kellis	MHBB679	putamen	PWoH	0	7169	26220	1860	187970242	0.957	0.44	0.962	0.95	0.96	0.963	0.913	0.061	0.639	0.214	0.675	0.15	0.971	43269	3911
mhbb679basalganglia	Corley	MHBB679	basalganglia	PWoH	0	26568	22494	1560	597630510	0.918	0.605	0.954	0.951	0.962	0.965	0.918	0.057	0.636	0.225	0.583	0.253	0.961	50046	2559
mhbb679hippocampus	Corley	MHBB679	hippocampus	PWoH	0	14140	37913	1959	536085509	0.914	0.463	0.953	0.959	0.965	0.959	0.898	0.05	0.645	0.203	0.539	0.287	0.95	48415	3710
240229Kel_D24-3124	kellis	MHBB686	Brodmann (1909) area 6	PWoH	0	4832	49186	2004	237667636	0.964	0.71	0.966	0.956	0.964	0.958	0.855	0.052	0.622	0.181	0.69	0.084	0.946	41573	4290
240229Kel_D24-3134	kellis	MHBB686	insular cortex	PWoH	0	6951	66617	2748	463052998	0.97	0.747	0.961	0.938	0.961	0.948	0.801	0.049	0.581	0.172	0.666	0.06	0.945	44061	6778
240229Kel_D24-3144	kellis	MHBB686	putamen	PWoH	0	3055	74762	1497	228398810	0.959	0.763	0.958	0.948	0.954	0.954	0.514	0.037	0.363	0.115	0.424	0.036	0.756	36114	3133
240229Kel_D24-3128	kellis	MHBB694	Brodmann (1909) area 6	PWoH	0	5121	21840	1881	111844656	0.953	0.388	0.965	0.957	0.962	0.96	0.908	0.053	0.567	0.288	0.675	0.153	0.941	41210	3480
240229Kel_D24-3138	kellis	MHBB694	insular cortex	PWoH	0	6734	30821	2113	207548494	0.966	0.43	0.965	0.954	0.962	0.959	0.896	0.059	0.609	0.228	0.697	0.112	0.959	43615	4202
240229Kel_D24-3148	kellis	MHBB694	putamen	PWoH	0	7217	29837	1391	215335625	0.972	0.598	0.96	0.939	0.957	0.943	0.866	0.061	0.632	0.173	0.705	0.069	0.945	42175	2321
240229Kel_D24-3129	kellis	MHBB705	Brodmann (1909) area 6	PWoH	0	8227	30793	2234	253335210	0.962	0.412	0.966	0.956	0.963	0.959	0.903	0.047	0.63	0.225	0.719	0.107	0.94	43948	5159
240229Kel_D24-3139	kellis	MHBB705	insular cortex	PWoH	0	9251	23323	2008	215760401	0.963	0.392	0.965	0.954	0.962	0.963	0.887	0.046	0.633	0.207	0.721	0.091	0.942	43199	4244
240229Kel_D24-3149	kellis	MHBB705	putamen	PWoH	0	8873	22193	2053	196917593	0.969	0.392	0.962	0.95	0.959	0.943	0.875	0.053	0.632	0.191	0.716	0.077	0.952	43152	4199
240229Kel_D24-3130	kellis	MHBB712	Brodmann (1909) area 6	PWoH	0	9648	39827	3192	384252451	0.967	0.452	0.966	0.954	0.963	0.958	0.905	0.051	0.632	0.223	0.715	0.111	0.954	46137	8062
240229Kel_D24-3140	kellis	MHBB712	insular cortex	PWoH	0	6367	33383	2291	212551708	0.958	0.544	0.963	0.957	0.96	0.933	0.684	0.045	0.415	0.225	0.567	0.047	0.757	41088	3955
240229Kel_D24-3150	kellis	MHBB712	putamen	PWoH	0	9867	13193	1270	130173992	0.965	0.336	0.963	0.943	0.96	0.952	0.906	0.06	0.666	0.18	0.694	0.123	0.955	42018	2266
240229Kel_D24-3125	kellis	MHBB742	Brodmann (1909) area 6	PWoH	0	4255	53207	2249	226394632	0.975	0.775	0.965	0.95	0.962	0.945	0.857	0.05	0.636	0.172	0.715	0.06	0.875	37741	5231
240229Kel_D24-3135	kellis	MHBB742	insular cortex	PWoH	0	6901	39955	3049	275730637	0.962	0.437	0.965	0.95	0.962	0.956	0.859	0.052	0.613	0.194	0.695	0.084	0.942	44608	8101
240229Kel_D24-3145	kellis	MHBB742	putamen	PWoH	0	4628	30312	2026	140282016	0.971	0.637	0.962	0.95	0.959	0.936	0.856	0.058	0.634	0.163	0.7	0.068	0.884	39169	4275
mhbb742basalganglia	Corley	MHBB742	basalganglia	PWoH	0	17429	26431	1649	460672914	0.936	0.638	0.953	0.958	0.962	0.961	0.887	0.054	0.625	0.208	0.625	0.182	0.946	46802	2721
mhbb742CP	Corley	MHBB742	CP	PWoH	0	33279	37824	1127	1258757938	0.928	0.871	0.957	0.941	0.967	0.946	0.827	0.051	0.485	0.292	0.621	0.132	0.743	47930	1568
mhbb742hippocampus	Corley	MHBB742	hippocampus	PWoH	0	11228	33839	2070	379942777	0.922	0.57	0.952	0.956	0.964	0.948	0.813	0.06	0.579	0.174	0.56	0.17	0.832	48347	3992
					Total	763974
					Mean	8233.71	58073.6	2033.62	3.96963e+08	0.916632	0.614232	0.964116	0.944937	0.961758	0.942832	0.819684	0.0529158	0.576095	0.190821	0.581	0.161884	0.889547	44196	4418.15
					Median	7006	46013	2004	345479032	0.957	0.615	0.965	0.946	0.962	0.946	0.857	0.053	0.6	0.181	0.618	0.116	0.904	44652	3990
					0	Specimens with HIV+ RNA
					0	Subjects with HIV+ RNA

## Sheet: PWoH selected
Sample name	Lab	Subject	Region	HIV status	HIV-infected cell count	Estimated Number of Cells	Mean Reads per Cell	Median Genes per Cell
JB_1058_2	Rana	3002	cerebellum	PWoH	0	18228	122725	2474
NNAB3038Fm_GEX_MAH	Ho	3038	frontal cortex & WM BA9	PWoH	0	9669	39735	2245
JB_1068_2	Rana	3039	cerebellum	PWoH	0	7490	36789	1750
3065occipital	Corley	3065	occipital	PWoH	0	9025	72943	2029
7102417477basalganglia	Corley	7102417477	basalganglia	PWoH	0	13562	40196	1458
7102417477occipital	Corley	7102417477	occipital	PWoH	0	10095	42347	2371
1702908282basalganglia	Corley	7102908282	basalganglia	PWoH	0	19244	36704	1642
1702908282hippo	Corley	7102908282	hippo	PWoH	0	14745	51500	1770
1702908282occipital	Corley	7102908282	occipital	PWoH	0	18855	44230	3074
HGC5HDMXY_NNTC_7103187468_Putamen	Kellis	7103187468	Putamen	PWoH	0	13006	32602	1564
H37LMDSX5_NNTC_7103458767_BA6-FC	Kellis	7103458767	Brodmann (1909) area 6	PWoH	0	5160	119463	1582
HGC5HDMXY_NNTC_7103476775_Putamen	Kellis	7103476775	Putamen	PWoH	0	5076	80057	2966
H37LMDSX5_NNTC_7103486577_BA6-FC	Kellis	7103486577	Brodmann (1909) area 6	PWoH	0	7078	62656	1460
HC3K3DSX5_230207Kel_3	Kellis	7103486577	Brodmann (1909) area 6	PWoH	0	9336	23227	1604
H37LMDSX5_NNTC_7103506866_Insula	Kellis	7103506866	insular cortex	PWoH	0	5066	99219	2048
H37LMDSX5_NNTC_7103518472_Insula	Kellis	7103518472	insular cortex	PWoH	0	6025	89618	1488
240229Kel_D24-3142	Kellis	MHBB654	Putamen	PWoH	0	2962	50737	2083
mhbb679basalganglia	Corley	MHBB679	basalganglia	PWoH	0	26568	22494	1560
mhbb679hippocampus	Corley	MHBB679	hippocampus	PWoH	0	14140	37913	1959
240229Kel_D24-3123	Kellis	MHBB679	Brodmann (1909) area 6	PWoH	0	11977	18159	2294
240229Kel_D24-3124	Kellis	MHBB686	Brodmann (1909) area 6	PWoH	0	4832	49186	2004
240229Kel_D24-3149	Kellis	MHBB705	Putamen	PWoH	0	8873	22193	2053
240229Kel_D24-3140	Kellis	MHBB712	insular cortex	PWoH	0	6367	33383	2291
mhbb742basalganglia	Corley	MHBB742	basalganglia	PWoH	0	17429	26431	1649
mhbb742CP	Corley	MHBB742	CP	PWoH	0	33279	37824	1127
mhbb742hippocampus	Corley	MHBB742	hippocampus	PWoH	0	11228	33839	2070
240229Kel_D24-3135	Kellis	MHBB742	insular cortex	PWoH	0	6901	39955	3049
27 specimens	4 labs	18 subjects	7 main regions		Total	316216
					Mean	11711.7	50597.2	1987.56
					Median	9669	39955	2004
					0	Specimens with HIV+ RNA
					0	Subjects with HIV+ RNA
