# Supplementary material
Source: Research Square preprint supplement (doi:10.21203/rs.3.rs-9013592/v1)
Supplement: Supplementary file 3 [file 2e779160e27a81922972a9d1.xlsx]

## Sheet: Table 1
Sample ID	Subject_ID	HIV-infected cell count	After reference update	Variant count
4084INS	4084	57	62	457
4084PFC	4084	46	60
4084VST	4084	11	12
6800127569_HIVOUD_INS	6800127569	46	47	520
6800127569_HIVOUD_VST	6800127569	1466	1605
6801187468_HIV_PFC	6801187468	11	11	282
7200597771basalganglia	7200597771	12	12	36
7200597771occipital	7200597771	1	1
1181VST	1181	11	11	21
1039PFC	1039	46	48	175
