# Supplementary material
Source: Research Square preprint supplement (doi:10.21203/rs.3.rs-9013592/v1)
Supplement: Supplementary file 4 [file 58a6d84fa603ba430f074971.xlsx]

## Sheet: supplementary figure1
Sample name	Total	1 Oligs	2 Astrocytes	3 Inhib Neuron HTR2C+ 1	4 Excite Neuron 1	5 Microglia	6 OPC	7 Inhib Neuron 1	8 Endo	9 Inhib Neuron 2	10 Excite Neuron 2	11 Excite Neuron 3	12 Excite Neuron HTR2C+ 1	13 Excite Neuron 4	14 Inhib Neuron HTR2C+ 2	15 Excite Neuron 5	Neuron Combined
All samples	559207	171604	77356	66690	66595	48125	37552	26264	22747	21590	10248	4343	2660	1951	1149	333	201823
PWH samples	314409	96541	43309	31282	39580	31956	19441	14105	15257	11586	6222	2007	1309	1775	39	0	107905
PWH samples excluding 6800127569_VST	299799	90554	40765	30231	39522	29880	18707	13807	14392	11335	6214	1388	1190	1775	0	0	105462
PWoH samples	244798	75063	34047	35408	27015	16169	18111	12159	7490	10004	4026	2336	1351	176	1110	333	93918
HIV UMI >0	1707	371	213	98	32	870	46	38	116	24	4	73	18	0	0	0	287
HIV UMI >1	908	55	44	14	7	714	6	8	37	5	0	15	3	0	0	0	52
HIV UMI >1 excluding 6800127569_VST	163	18	4	2	6	115	2	13	2	0	0	1	0	0	0	0	22
HIV UMI >2	638	21	21	5	5	638	3	3	23	1	0	9	3	0	0	0	26
% of PWH (>1)	0.00288796	0.000569706	0.00101596	0.000447542	0.000176857	0.0223432	0.000308626	0.000567175	0.00242512	0.000431555	0	0.00747384	0.00229183	N/A	N/A	N/A	0.000240953
% of PWH (>1) excluding 6800127569_VST	0.000543698	0.000198776	9.81234e-05	6.61573e-05	0.000151814	0.00384873	0.000106912	0.000941551	0.000138966	0	0	0.000720461	0	0	N/A	N/A	0.000208606
% of infected (>1)	1	0.0605727	0.0484581	0.0154185	0.00770925	0.786344	0.00660793	0.00881057	0.0407489	0.00550661	0	0.0165198	0.00330396	N/A	N/A	N/A	0.0572687
