# Supplementary material
Source: Research Square preprint supplement (doi:10.21203/rs.3.rs-9013592/v1)
Supplement: Supplementary file 5 [file 8b4ec91831e60be126eddbf8.xlsx]

## Sheet: Table 2
cell type	precision	recall	f1	accuracy
Bergmann glial cell	N/A	N/A	N/A	N/A
astrocyte	0.81	1	0.88	1
central nervous system macrophage	0.99	0.94	0.96	0.94
choroid plexus epithelial cell	N/A	N/A	N/A	N/A
endothelial cell	0.96	1	0.98	1
ependymal cell	N/A	N/A	N/A	N/A
fibroblast	N/A	N/A	N/A	N/A
leukocyte	0.93	1	0.96	1
neuron	0.94	0.98	0.96	0.98
oligodendrocyte	1	0.95	0.97	0.95
oligodendrocyte precursor cell	1	0.75	0.83	0.75
pericyte	N/A	N/A	N/A	N/A
vascular associated smooth muscle cell	N/A	N/A	N/A	N/A
